# Supplementary material for: Feature-Based Molecular Networking Facilitates the Comprehensive Identification of Differential Metabolites in Diabetic Cognitive Dysfunction Rats
Source: MDPI journal article supplement (doi:10.3390/metabo13040538), 2023-04-10
Supplement: s1 [file s1]

Article

# Feature-based Molecular Networking Facilitates Comprehensive Identification of Differential Metabolites in Diabetic Cognitive Dysfunction Rats

Ke Du, Chuanjia Zhai, Xuejiao Li, Hongchuan Gang, Xiaoyan Gao \*

School of Chinese Materia Medica, Beijing University of Chinese Medicine, Beijing102488, China.

\* Correspondence: gaoyaoyan@bucm.edu.cn

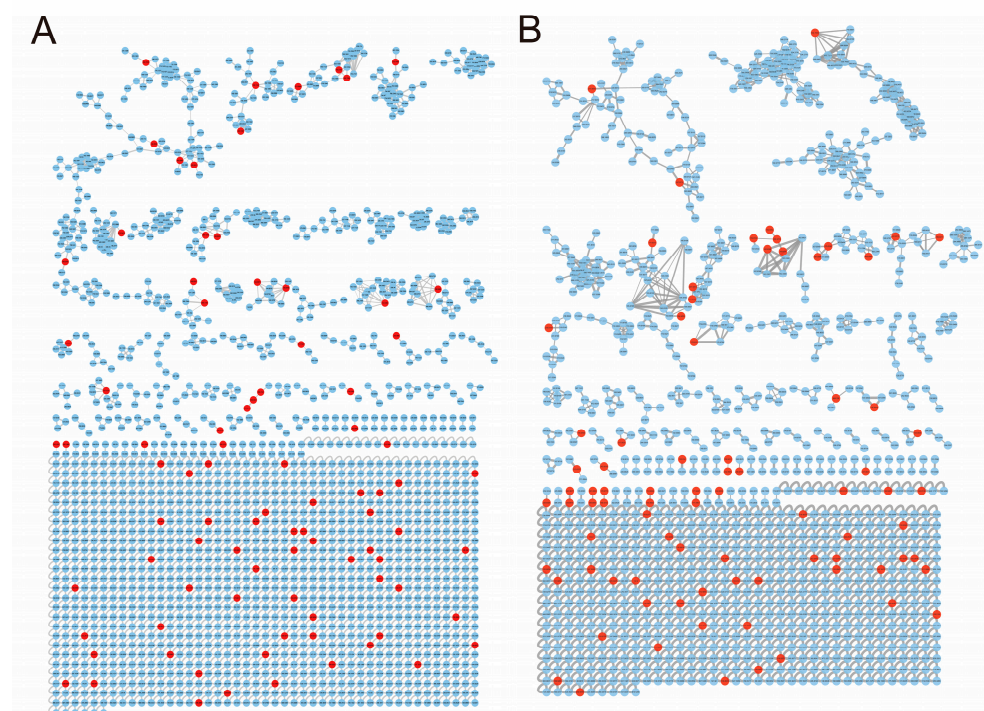

**Figure S1.** FBMN of the hippocampal tissue in positive (A) and negative (B) ion modes by the HILIC column. (The differential features are colored in red, the  $m/z$  of each feature is displayed at the center of the nodes, and the width of the edges show the magnitude of the cosine score, FBMN: feature-based molecular networking).

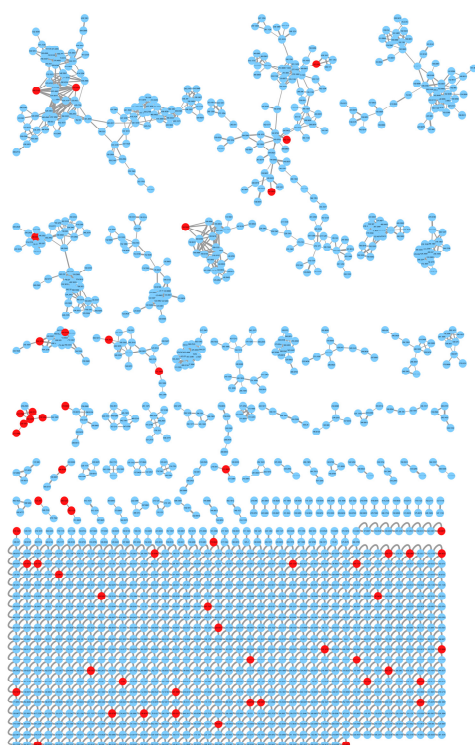

**Figure S2.** FBMN of the hippocampal tissue in positive ion mode by the RP column. (The differential features are colored in red, the  $m/z$  of each feature is displayed at the center of the nodes, and the width of the edges show the magnitude of the cosine score, FBMN: feature-based molecular networking).

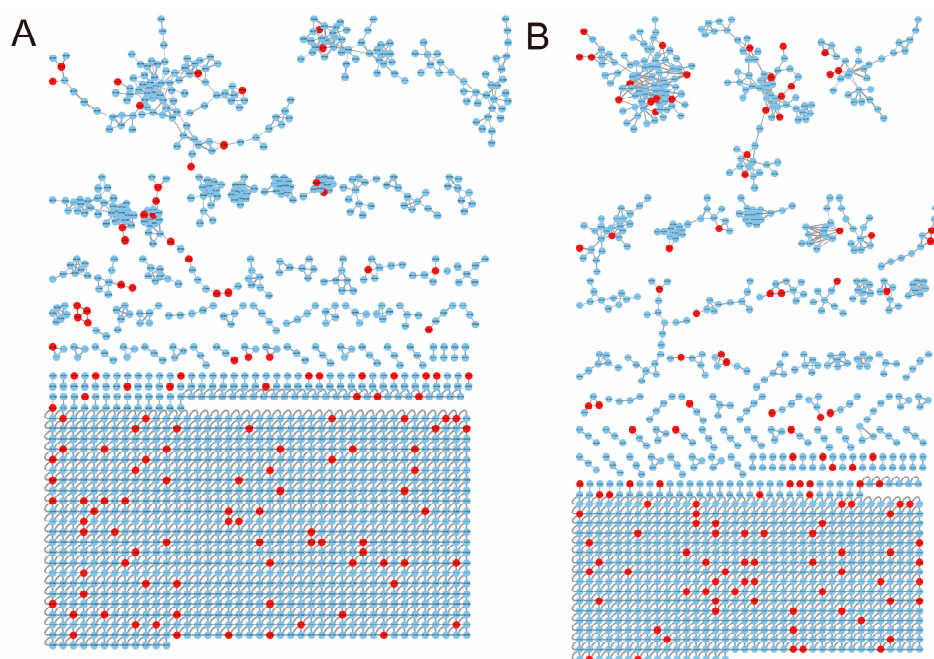

**Figure S3.** FBMN of urine in positive (A) and negative (B) ion modes by the HILIC column. (The differential features are colored in red, the  $m/z$  of each feature is displayed at the center of the nodes, and the width of the edges show the magnitude of the cosine score, FBMN: feature-based molecular networking).

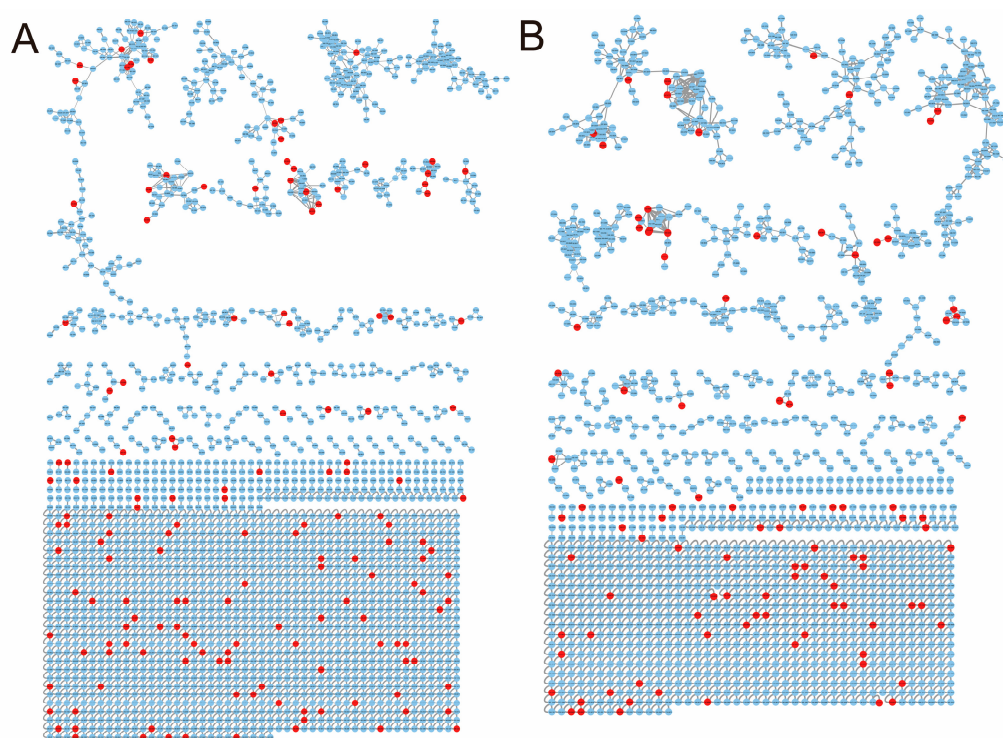

**Figure S4.** FBMN of urine in positive (A) and negative (B) ion modes by the RP column. (The differential features are colored in red, the  $m/z$  of each feature is displayed at the center of the nodes, and the width of the edges show the magnitude of the cosine score, FBMN: feature-based molecular networking).

**Table S1.** Differential metabolites in hippocampal tissues.

| NO. | Metabolite/Class             | HMDB        | $m/z$    | Formula                                                       | RT (min) | VIP  | P value | LOG2FC<br>(DCD/T2DM) |
|-----|------------------------------|-------------|----------|---------------------------------------------------------------|----------|------|---------|----------------------|
| 1   | Aconitic acid                | HMDB0000072 | 173.0088 | C <sub>6</sub> H <sub>6</sub> O <sub>6</sub>                  | 0.99     | 1.60 | 0.04    | 0.29                 |
| 2   | Inosine                      | HMDB0000195 | 267.0731 | C <sub>10</sub> H <sub>12</sub> N <sub>4</sub> O <sub>5</sub> | 3.25     | 1.37 | 0.01    | 0.24                 |
| 3   | N1-Acetylspermidine          | HMDB0001276 | 188.1748 | C <sub>9</sub> H <sub>21</sub> N <sub>3</sub> O               | 7.75     | 1.41 | 0.02    | 0.67                 |
| 4   | Aminoacetone                 | HMDB0002134 | 74.0600  | C <sub>3</sub> H <sub>7</sub> NO                              | 1.52     | 1.05 | 0.02    | 0.56                 |
| 5   | gamma-Glutamylalanin         | HMDB0006248 | 217.0825 | C <sub>8</sub> H <sub>14</sub> N <sub>2</sub> O <sub>5</sub>  | 5.89     | 1.63 | 0.04    | -0.46                |
| 6   | Trichloroethanol glucuronide | HMDB0042049 | 390.9373 | C <sub>8</sub> H <sub>11</sub> Cl <sub>3</sub> O <sub>7</sub> | 5.19     | 1.56 | 0.02    | -1.38                |
| 7   | 2-phospho-D-glycerate        | HMDB0304085 | 205.9607 | C <sub>3</sub> H <sub>4</sub> O <sub>7</sub> P                | 4.67     | 1.59 | 0.01    | -2.18                |
| 8   | Adenine                      | HMDB0000034 | 136.0616 | C <sub>5</sub> H <sub>5</sub> N <sub>5</sub>                  | 4.10     | 1.47 | 0.03    | 0.23                 |
| 9   | L-Carnitine                  | HMDB0000062 | 162.1122 | C <sub>7</sub> H <sub>15</sub> N <sub>3</sub> O               | 0.64     | 1.85 | 0.01    | -0.58                |
| 10  | Galactitol                   | HMDB0000107 | 181.0715 | C <sub>6</sub> H <sub>14</sub> O <sub>6</sub>                 | 5.50     | 1.12 | 0.04    | 0.47                 |
| 11  | gamma-Aminobutyric acid      | HMDB0000112 | 104.0701 | C <sub>4</sub> H <sub>9</sub> NO <sub>2</sub>                 | 4.89     | 1.48 | 0.05    | -2.16                |
| 12  | Fumaric acid                 | HMDB0000134 | 115.0035 | C <sub>4</sub> H <sub>4</sub> O <sub>4</sub>                  | 7.99     | 1.67 | 0.01    | 0.24                 |
| 13  | L-Glutamic acid              | HMDB0000148 | 148.0598 | C <sub>5</sub> H <sub>9</sub> NO <sub>4</sub>                 | 7.44     | 1.65 | 0.05    | 1.94                 |
| 14  | Malic acid                   | HMDB0000156 | 133.0140 | C <sub>4</sub> H <sub>6</sub> O <sub>5</sub>                  | 6.62     | 1.55 | 0.04    | 0.69                 |
| 15  | Oxoglutaric acid             | HMDB0000208 | 145.0139 | C <sub>5</sub> H <sub>6</sub> O <sub>5</sub>                  | 0.99     | 1.68 | 0.02    | 0.42                 |
| 16  | Pantothenic acid             | HMDB0000210 | 218.1034 | C <sub>9</sub> H <sub>17</sub> NO <sub>5</sub>                | 3.58     | 3.25 | 0.02    | -0.53                |
| 17  | Uridine                      | HMDB0000296 | 243.0619 | C <sub>9</sub> H <sub>12</sub> N <sub>2</sub> O <sub>6</sub>  | 2.03     | 1.42 | 0.02    | 0.31                 |
| 18  | Xanthosine                   | HMDB0000299 | 283.0684 | C <sub>10</sub> H <sub>12</sub> N <sub>4</sub> O <sub>6</sub> | 3.26     | 1.97 | 0.00    | 0.41                 |
| 19  | gamma-Butyrolactone          | HMDB0000549 | 87.0439  | C <sub>4</sub> H <sub>6</sub> O <sub>2</sub>                  | 0.64     | 1.94 | 0.01    | -0.41                |
| 20  | Gluconic acid                | HMDB0000625 | 195.0506 | C <sub>6</sub> H <sub>12</sub> O <sub>7</sub>                 | 7.53     | 1.52 | 0.02    | 0.67                 |
| 21  | Propionylcarnitine           | HMDB0000824 | 217.1535 | C <sub>10</sub> H <sub>19</sub> NO <sub>4</sub>               | 4.98     | 1.58 | 0.02    | 2.12                 |
| 22  | 1-Methylhistamine            | HMDB0000898 | 126.1024 | C <sub>6</sub> H <sub>11</sub> N <sub>3</sub>                 | 0.53     | 2.03 | 0.01    | -1.71                |

|    |                                               |             |          |              |       |      |      |       |
|----|-----------------------------------------------|-------------|----------|--------------|-------|------|------|-------|
| 23 | Citrulline                                    | HMDB0000904 | 176.1027 | C6H13N3O3    | 0.99  | 1.59 | 0.02 | 0.52  |
| 24 | N-Acetylaspartylglutamic acid                 | HMDB0001067 | 303.0835 | C11H16N2O8   | 1.75  | 11.8 | 0.00 | -0.82 |
| 25 | Acetylphosphate                               | HMDB0001494 | 140.0104 | C2H5O5P      | 7.81  | 1.50 | 0.02 | -1.13 |
| 26 | 2-Methylguanosine                             | HMDB0005862 | 315.1409 | C11H15N5O5   | 7.83  | 1.26 | 0.05 | -1.46 |
| 27 | Creatine                                      | HMDB000064  | 130.0620 | C4H9N3O2     | 6.57  | 1.49 | 0.02 | 0.17  |
| 28 | PC(18:1(11Z))/P-18:0)                         | HMDB0008094 | 794.6009 | C44H86NO7P   | 0.75  | 1.26 | 0.02 | -1.74 |
| 29 | PE(22:6(4Z,7Z,10Z,13Z,16Z,19Z))/P-18:0)       | HMDB0009709 | 774.5480 | C45H78NO7P   | 8.04  | 1.69 | 0.01 | -0.47 |
| 30 | LysoPC(0:0/18:0)                              | HMDB0011128 | 524.3709 | C26H54NO7P   | 7.24  | 1.83 | 0.01 | 2.49  |
| 31 | LysoPE(16:0/0:0)                              | HMDB0011503 | 454.2921 | C20H40O2     | 7.68  | 1.62 | 0.04 | 0.45  |
| 32 | 3-O-Sulfogalactosylceramide (d18:1/24:1(15Z)) | HMDB0012318 | 888.6276 | C45H78NO7P   | 11.06 | 3.10 | 0.03 | -0.56 |
| 33 | 9-Decenoylcholine                             | HMDB0013206 | 256.2265 | C15H30NO2    | 7.34  | 2.28 | 0.00 | 0.57  |
| 34 | Beta-Citryl-L-glutamic acid                   | HMDB0013220 | 320.0624 | C11H15NO10   | 1.70  | 1.14 | 0.03 | -0.55 |
| 35 | Heptanoylcholine                              | HMDB0013239 | 216.1954 | C12H26NO2    | 6.43  | 1.80 | 0.05 | 0.92  |
| 36 | 3-Hydroxyhexadecanoylcarnitine                | HMDB0013336 | 416.3351 | C23H45NO5    | 1.32  | 1.50 | 0.03 | -1.14 |
| 37 | N,N-Dimethylsphingosine                       | HMDB0013645 | 328.3201 | C20H41NO2    | 7.49  | 1.37 | 0.03 | 0.95  |
| 38 | Asparaginyglutamine                           | HMDB0028729 | 260.1340 | C9H16N4O5    | 6.75  | 1.67 | 0.03 | -0.60 |
| 39 | Glutamylglycine                               | HMDB0028819 | 205.0811 | C7H12N2O5    | 8.27  | 1.43 | 0.03 | -1.11 |
| 40 | Methionyl-Methionine                          | HMDB0028979 | 263.0882 | C10H20N2O3S2 | 0.01  | 1.79 | 0.00 | -2.52 |
| 41 | Valylaspartic acid                            | HMDB0029123 | 231.0982 | C9H16N2O5    | 7.49  | 1.03 | 0.04 | 0.44  |
| 42 | Phenyl vinyl sulfide                          | HMDB0031825 | 137.0413 | C8H8S        | 1.22  | 1.40 | 0.05 | 1.94  |
| 43 | 2,3-Diacetoxypentyl stearate                  | HMDB0059931 | 465.3182 | C25H46O6     | 7.93  | 1.53 | 0.03 | 0.55  |
| 44 | N-(2-formyl-3-chlorophenyl)anthranilic acid   | HMDB0060006 | 298.0238 | C14H10ClNO3  | 5.36  | 1.61 | 0.02 | -1.93 |
| 45 | 2,5-Dichloro-4-oxohex-2-enedioate             | HMDB0060363 | 226.9511 | C6H4Cl2O5    | 0.55  | 1.90 | 0.01 | -0.40 |
| 46 | N-Methylhistamine                             | HMDB0061685 | 126.1020 | C6H11N3      | 5.75  | 1.43 | 0.01 | -1.53 |
| 47 | PS(22:1(13Z)/14:0)                            | HMDB0112736 | 790.5565 | C42H80NO10P  | 0.81  | 1.26 | 0.05 | -0.59 |
| 48 | SM(d16:1/22:0)                                | HMDB0240618 | 759.6348 | C43H87N2O6P  | 7.93  | 1.58 | 0.01 | 0.95  |
| 49 | N-Myristoyl Glutamine                         | HMDB0242050 | 730.5701 | C19H36N2O4   | 7.98  | 1.48 | 0.00 | 0.95  |
| 50 | N-Myristoyl Valine                            | HMDB0242063 | 327.2996 | C19H37NO3    | 6.93  | 1.77 | 0.00 | 0.69  |
| 51 | 6-methylnonadecanoic acid                     | HMDB0340381 | 330.3357 | C20H40O2     | 7.40  | 1.71 | 0.02 | 0.29  |
| 52 | (2E,6Z)-dodeca-2,6-dienoic acid               | HMDB0340680 | 214.1798 | C12H20O2     | 6.69  | 2.08 | 0.02 | 0.97  |
| 53 | 4-Hydroxydodecanoic acid                      | HMDB0340733 | 216.1949 | C12H24O3     | 0.75  | 1.56 | 0.03 | 1.26  |
| 54 | (3E,5E)-trideca-3,5-dienoic acid              | HMDB0340750 | 211.1689 | C13H22O2     | 6.91  | 2.34 | 0.01 | 0.55  |
| 55 | 3-oxotridecanoic acid                         | HMDB0340773 | 228.1953 | C13H24O3     | 6.91  | 2.36 | 0.00 | 0.56  |
| 56 | (2E)-4-hydroxytetradec-2-enoic acid           | HMDB0340788 | 242.2110 | C14H26O3     | 7.13  | 2.15 | 0.00 | 0.44  |
| 57 | N6,N6-dimethyllysine                          | HMDB0341183 | 174.1594 | C8H18N2O2    | 2.32  | 1.25 | 0.05 | 1.03  |
| 58 | Oxamide                                       | HMDB0341188 | 88.0504  | C2H4N2O2     | 5.63  | 1.24 | 0.03 | 1.49  |
| 59 | pyroglutamylmethionine                        | HMDB0341384 | 259.0757 | C10H16N2O4S  | 3.09  | 1.23 | 0.02 | -0.68 |
| 60 | Glutamylglutamine                             | HMDB28817   | 275.1336 | C10H17N3O6   | 8.27  | 1.56 | 0.02 | -0.83 |
| 61 | Substituted imidazoles                        |             | 136.8914 |              | 1.41  | 1.73 | 0.01 | -0.89 |
| 62 | Organic acids and derivatives                 |             | 159.0102 |              | 6.62  | 1.56 | 0.05 | 0.67  |
| 63 | Sugar acids and Sugar acids and derivatives   |             | 194.9056 |              | 3.65  | 1.12 | 0.01 | -0.72 |
| 64 | Pyrimidine nucleosides                        |             | 243.9677 |              | 2.66  | 1.50 | 0.03 | -0.58 |
| 65 | Organic phosphoric acids and derivatives      |             | 244.9629 |              | 7.30  | 1.24 | 0.05 | -0.35 |
| 66 | Quaternary ammonium salts                     |             | 146.9798 |              | 7.90  | 1.12 | 0.05 | -0.99 |
| 67 | Organic nitrogen compounds                    |             | 166.0257 |              | 7.83  | 1.46 | 0.02 | -0.74 |
| 68 | Indoles and derivatives                       |             | 205.1037 |              | 4.69  | 1.59 | 0.02 | -3.50 |
| 69 | Dipeptides                                    |             | 388.0611 |              | 1.79  | 2.77 | 0.00 | -0.81 |
| 70 | Carbonyl compounds                            |             | 184.5503 |              | 1.65  | 2.23 | 0.00 | -0.94 |
| 71 | Glycerophospholipids                          |             | 688.5183 |              | 8.31  | 1.96 | 0.01 | 0.66  |

**Table S2.** Differential metabolites in urine.

| NO. | Metabolite/Class                                | HMDB        | <i>m/z</i> | Formula     | RT (min) | VIP  | P Value | LOG2FC (DCD/T2DM) |
|-----|-------------------------------------------------|-------------|------------|-------------|----------|------|---------|-------------------|
| 1   | 1-Methylhistidine                               | HMDB0000001 | 170.0925   | C7H11N3O2   | 2.14     | 1.35 | 0.03    | 0.81              |
| 2   | 4-Pyridoxic acid                                | HMDB0000017 | 206.0424   | C8H9NO4     | 1.22     | 1.38 | 0.01    | 0.66              |
| 3   | Dihydrobiopterin                                | HMDB0000038 | 239.1251   | C9H13N5O3   | 2.42     | 1.12 | 0.02    | -2.12             |
| 4   | Dihydrouracil                                   | HMDB0000076 | 173.0569   | C4H6N2O2    | 1.15     | 1.50 | 0.02    | 1.15              |
| 5   | Lysine                                          | HMDB0000182 | 147.1129   | C6H14N2O2   | 5.68     | 1.49 | 0.03    | 0.65              |
| 6   | Ornithine                                       | HMDB0000214 | 115.0867   | C5H12N2O2   | 4.60     | 1.67 | 0.01    | 0.77              |
| 7   | Urea                                            | HMDB0000294 | 138.0980   | CH4N2O      | 5.19     | 1.60 | 0.02    | 0.50              |
| 8   | Glutamine                                       | HMDB0000641 | 129.0659   | C5H10N2O3   | 4.14     | 1.26 | 0.02    | -0.50             |
| 9   | Pelargonic acid                                 | HMDB0000847 | 158.1541   | C9H18O2     | 1.57     | 1.54 | 0.04    | 0.56              |
| 10  | Indoleacetaldehyde                              | HMDB0001190 | 160.0758   | C10H9NO     | 2.58     | 1.29 | 0.03    | -0.94             |
| 11  | Ophthalmic acid                                 | HMDB0005765 | 289.1506   | C11H19N3O6  | 7.54     | 1.61 | 0.03    | -2.63             |
| 12  | N-Acetylleucine                                 | HMDB0011756 | 174.1126   | C8 H15 N O3 | 4.07     | 1.59 | 0.04    | -1.22             |
| 13  | Propionylcholine                                | HMDB0013305 | 159.1494   | C8H18NO2    | 1.79     | 1.34 | 0.03    | 2.26              |
| 14  | Serylmethionine                                 | HMDB0029045 | 237.0904   | C8H16N2O4S  | 0.62     | 1.21 | 0.02    | -1.98             |
| 15  | Valylasparagine                                 | HMDB0029122 | 232.1296   | C9H17N3O4   | 2.94     | 1.37 | 0.03    | 1.95              |
| 16  | Valylproline                                    | HMDB0029135 | 215.1390   | C10H18N2O3  | 0.88     | 1.13 | 0.03    | -2.42             |
| 17  | Tyrosine methylester                            | HMDB0029217 | 195.1116   | C10H13NO3   | 4.87     | 1.52 | 0.03    | 2.19              |
| 18  | Prenyl glucoside                                | HMDB0031876 | 307.1401   | C11H20O6    | 9.92     | 1.45 | 0.00    | 0.95              |
| 19  | Furaneol 4-glucoside                            | HMDB0032992 | 290.1232   | C12H18O8    | 1.17     | 1.32 | 0.02    | -0.93             |
| 20  | Pyrraline                                       | HMDB0033143 | 254.1499   | C12H18N2O4  | 6.02     | 1.29 | 0.03    | -0.64             |
| 21  | 11-hydroxyhexadeca-6,12-dienoic acid            | HMDB0340891 | 269.2111   | C16H28O3    | 12.20    | 1.26 | 0.03    | -0.62             |
| 22  | oct-5-enoic acid                                | HMDB0340975 | 141.0923   | C8H14O2     | 11.38    | 1.47 | 0.02    | 0.54              |
| 23  | 2-hydroxyoct-4-enedioic acid                    | HMDB0340986 | 206.1024   | C8H12O5     | 1.80     | 1.55 | 0.04    | 0.50              |
| 24  | Adenosine                                       | HMDB0000050 | 267.1206   | C13H16N2O4  | 1.01     | 1.45 | 0.02    | 0.73              |
| 25  | Glyceric acid                                   | HMDB0000139 | 105.0194   | C3H6O4      | 0.96     | 1.50 | 0.02    | -0.80             |
| 26  | L-Glutamic acid                                 | HMDB0000148 | 130.0500   | C5H9NO4     | 1.10     | 1.16 | 0.01    | -0.24             |
| 27  | L-Phenylalanine                                 | HMDB0000159 | 166.0863   | C9H11NO2    | 1.44     | 1.68 | 0.01    | 0.62              |
| 28  | L-Acetylcarnitine                               | HMDB0000201 | 204.1232   | C9H17NO4    | 4.66     | 1.31 | 0.04    | -1.34             |
| 29  | Oxoglutaric acid                                | HMDB0000208 | 129.0183   | C5H6O5      | 1.17     | 1.22 | 0.05    | 0.61              |
| 30  | Oxadipic acid                                   | HMDB0000225 | 159.0299   | C6H8O5      | 5.77     | 1.27 | 0.04    | 0.53              |
| 31  | Pyruvic acid                                    | HMDB0000243 | 87.0087    | C3H4O3      | 2.49     | 1.48 | 0.03    | 1.99              |
| 32  | Taurine                                         | HMDB0000251 | 124.0075   | C2H7NO3S    | 1.39     | 1.34 | 0.01    | 1.45              |
| 33  | 3-Amino-2-piperidone                            | HMDB0000323 | 132.1132   | C5H10N2O    | 3.31     | 1.55 | 0.03    | 0.58              |
| 34  | Aminoadipic acid                                | HMDB0000510 | 160.0616   | C6H11NO4    | 4.75     | 1.51 | 0.02    | 0.95              |
| 35  | 2-Octenedioic acid                              | HMDB0000341 | 171.0665   | C8H12O4     | 10.11    | 1.41 | 0.01    | 0.46              |
| 36  | 3-Methoxy-4-hydroxyphenylethyleneglycol sulfate | HMDB0000559 | 263.0230   | C9H12O7S    | 1.24     | 1.70 | 0.00    | -1.48             |
| 37  | Cytosine                                        | HMDB0000630 | 112.0506   | C4H5N3O     | 2.14     | 1.30 | 0.04    | -0.44             |
| 38  | Glucaric acid                                   | HMDB0000663 | 209.0304   | C6H10O8     | 0.94     | 1.58 | 0.03    | -1.20             |
| 39  | L-Leucine                                       | HMDB0000687 | 114.0914   | C6H13NO2    | 10.09    | 1.62 | 0.02    | 0.79              |
| 40  | L-2-Hydroxyglutaric acid                        | HMDB0000694 | 147.0299   | C5H8O5      | 7.02     | 1.57 | 0.00    | 0.52              |
| 41  | 5-Hydroxyindoleacetic acid                      | HMDB0000763 | 174.0563   | C10H9NO3    | 6.48     | 1.36 | 0.02    | -0.89             |
| 42  | Vinylacetyl glycine                             | HMDB0000894 | 124.0404   | C6H9NO3     | 11.30    | 1.48 | 0.02    | 0.86              |
| 43  | Citrulline                                      | HMDB0000904 | 176.1031   | C6H13N3O3   | 7.50     | 1.45 | 0.04    | -1.34             |
| 44  | Hypotaurine                                     | HMDB0000965 | 110.0271   | C2H7NO2S    | 6.48     | 1.26 | 0.03    | -0.83             |
| 45  | Dihydrolipoamide                                | HMDB0000985 | 225.1095   | C8H17NOS2   | 2.73     | 1.41 | 0.03    | -1.31             |
| 46  | 2-Aminobenzoic acid                             | HMDB0001123 | 138.0550   | C7H7NO2     | 0.76     | 1.39 | 0.05    | 0.98              |
| 47  | Nornicotine                                     | HMDB0001126 | 166.1342   | C9H12N2     | 18.79    | 1.42 | 0.05    | 0.40              |
| 48  | 4-Aminophenol                                   | HMDB0001169 | 110.0601   | C6H7NO      | 1.89     | 1.18 | 0.04    | -0.31             |
| 49  | 5'-Methylthioadenosine                          | HMDB0001173 | 278.0704   | C11H15N5O3S | 7.55     | 1.09 | 0.02    | 0.52              |
| 50  | N2-Succinyl-L-ornithin                          | HMDB0001199 | 231.0986   | C9H16N2O5   | 7.06     | 1.42 | 0.04    | -0.98             |



|    |                                                   |             |          |             |       |      |      |       |
|----|---------------------------------------------------|-------------|----------|-------------|-------|------|------|-------|
| 51 | 3,4-Dihydroxybenzeneacetic acid                   | HMDB0001336 | 151.0391 | C8H8O4      | 0.22  | 1.48 | 0.02 | 0.63  |
| 52 | 4-Trimethylammoniobutanol                         | HMDB0001345 | 130.1227 | C7H16NO     | 2.44  | 1.14 | 0.04 | -2.24 |
| 53 | N-Acetylputrescine                                | HMDB0002064 | 131.1180 | C6H14N2O    | 0.97  | 1.47 | 0.00 | 0.64  |
| 54 | Desaminotyrosine                                  | HMDB0002199 | 225.0769 | C9H10O3     | 1.01  | 1.44 | 0.03 | 0.45  |
| 55 | Deoxyribose                                       | HMDB0003224 | 133.0507 | C5 H10 O4   | 1.75  | 1.59 | 0.00 | -1.23 |
| 56 | Pyrimidine                                        | HMDB0003361 | 98.0715  | C4H4N2      | 18.83 | 1.43 | 0.05 | 0.41  |
| 57 | Formylanthranilic acid                            | HMDB0004089 | 148.0395 | C8H7NO3     | 2.78  | 1.58 | 0.02 | 0.85  |
| 58 | N1-Methyl-4-pyridone-3-carboxamide                | HMDB0004194 | 135.0554 | C7H8N2O2    | 9.83  | 1.79 | 0.00 | 1.39  |
| 59 | Phytosphingosine                                  | HMDB0004610 | 318.3011 | C18H39NO3   | 16.60 | 1.26 | 0.04 | 0.46  |
| 60 | Indolylacryloylglycine                            | HMDB0006005 | 243.0776 | C13H12N2O3  | 11.57 | 1.22 | 0.05 | 1.13  |
| 61 | N-Acetylglutamine                                 | HMDB0006029 | 188.1031 | C7H12N2O4   | 1.17  | 1.37 | 0.01 | 1.26  |
| 62 | Putrescine                                        | HMDB0006078 | 161.1286 | C7H17N2O2   | 8.27  | 1.74 | 0.00 | -0.58 |
| 63 | Heptadecanoyl carnitine                           | HMDB0006210 | 431.3845 | C24H47NO4   | 10.22 | 1.66 | 0.01 | 0.96  |
| 64 | 6'-Sialyllactose                                  | HMDB0006569 | 632.2064 | C23H39NO19  | 1.04  | 1.32 | 0.04 | -1.23 |
| 65 | Beta-D-Glucopyranuronic acid                      | HMDB0010314 | 373.0782 | C13H14O9    | 7.72  | 1.47 | 0.04 | -0.64 |
| 66 | Malonic semialdehyde                              | HMDB0011111 | 147.0301 | C3H4O3      | 1.51  | 1.62 | 0.03 | -0.69 |
| 67 | Aspartylhydroxyproline                            | HMDB0011160 | 245.0779 | C9H14N2O6   | 1.49  | 1.24 | 0.04 | 0.94  |
| 68 | 2-(3-Carboxy-3-(methylammonio)propyl)-L-histidine | HMDB0011654 | 271.1401 | C11H19N4O4  | 1.77  | 1.54 | 0.02 | 1.90  |
| 69 | Cytidine 2',3'-cyclic phosphate                   | HMDB0011691 | 306.0497 | C9H12N3O7P  | 19.08 | 1.45 | 0.05 | 0.51  |
| 70 | N-Acetyl-L-methionine                             | HMDB0011745 | 190.0544 | C7H13NO3S   | 1.46  | 1.23 | 0.04 | -1.13 |
| 71 | Cer(d18:0/14:0)                                   | HMDB0011759 | 512.5040 | C32H65NO3   | 0.70  | 1.65 | 0.01 | 1.21  |
| 72 | 5-Aminopentanamide                                | HMDB0012176 | 117.1023 | C5H12N2O    | 4.62  | 1.60 | 0.03 | 0.76  |
| 73 | Histidinal                                        | HMDB0012234 | 140.0819 | C6H9N3O     | 1.06  | 1.38 | 0.03 | 0.81  |
| 74 | Isopentenyladenine-9-N-glucoside                  | HMDB0012240 | 383.2038 | C16H23N5O5  | 7.33  | 1.40 | 0.04 | -1.03 |
| 75 | Methacholine                                      | HMDB0015654 | 160.1333 | C10H9NO     | 3.23  | 1.55 | 0.04 | 0.96  |
| 76 | Alanylproline                                     | HMDB0028695 | 187.1079 | C8H14N2O3   | 5.56  | 1.59 | 0.02 | 0.84  |
| 77 | Glutamylleucine                                   | HMDB0028823 | 261.1446 | C11H20N2O5  | 7.54  | 1.63 | 0.02 | -1.84 |
| 78 | Hydroxypropyl-Proline                             | HMDB0028871 | 229.1184 | C10H16N2O4  | 7.46  | 1.55 | 0.03 | -1.95 |
| 79 | Threonylhistidine                                 | HMDB0029063 | 257.1243 | C10H16N4O4  | 1.16  | 1.44 | 0.03 | -0.56 |
| 80 | 3-Hydroxy-2-methylglutaric acid                   | HMDB0029169 | 161.0456 | C6H10O5     | 2.26  | 1.20 | 0.04 | 0.42  |
| 81 | N-Phenylacetylaspatic acid                        | HMDB0029355 | 250.0722 | C12H13NO5   | 1.75  | 1.25 | 0.02 | -1.24 |
| 82 | Chymopapain                                       | HMDB0029845 | 268.9433 | C6H6O8S2    | 0.82  | 1.61 | 0.01 | -1.68 |
| 83 | 2-Dodecylbenzenesulfonic acid                     | HMDB0031031 | 325.1846 | C18H30O3S   | 1.75  | 1.58 | 0.01 | 0.53  |
| 84 | 3-Formyl-6-hydroxyindole                          | HMDB0031172 | 162.0550 | C9H7NO2     | 0.97  | 1.02 | 0.03 | -1.76 |
| 85 | (E,E)-2,4-Hexadienedial                           | HMDB0031180 | 109.0295 | C6H6O2      | 6.20  | 1.42 | 0.00 | 0.53  |
| 86 | (2E,6E)-nona-2,6-dienoic acid                     | HMDB0031302 | 153.0923 | C9H14O2     | 11.93 | 1.17 | 0.03 | 0.56  |
| 87 | (E)-8-Hydroxy-2-octene-4,6-dienoic acid           | HMDB0031515 | 151.0391 | C8H6O3      | 19.06 | 1.43 | 0.03 | 0.61  |
| 88 | Piperidine                                        | HMDB0031678 | 336.3265 | C22H41NO    | 18.25 | 1.32 | 0.04 | 0.43  |
| 89 | O-Ethyl S,S-diphenyl phosphorodithioate           | HMDB0031781 | 619.0400 | C14H15O2PS2 | 1.69  | 1.41 | 0.03 | -1.09 |
| 90 | 2,5-Dimethyl-3-furanthiol acetate                 | HMDB0032234 | 193.0288 | C8H10O2S    | 19.08 | 1.46 | 0.02 | 0.60  |
| 91 | N-Lactoyl ethanolamine                            | HMDB0032356 | 134.0813 | C5H11NO3    | 10.05 | 1.51 | 0.05 | 0.61  |
| 92 | 2-(4-Methyl-5-thiazolyl)ethyl butanoate           | HMDB0032418 | 444.1964 | C10H15NO2S  | 2.22  | 1.50 | 0.01 | -1.24 |
| 93 | 4-Pentenal                                        | HMDB0032458 | 85.0650  | C5H8O       | 17.85 | 1.46 | 0.05 | 0.40  |
| 94 | N-Undecylbenzenesulfonic acid                     | HMDB0032549 | 311.1690 | C17H28O3S   | 1.75  | 1.74 | 0.00 | 0.46  |
| 95 | N-Carbamoylputrescine                             | HMDB0033458 | 132.1132 | C5H13N3O    | 5.76  | 1.71 | 0.00 | 0.99  |
| 96 | 2,5-Undecadienal                                  | HMDB0033546 | 189.1246 | C11H18O     | 5.84  | 1.38 | 0.02 | -1.02 |
| 97 | 2-Methyl-1-propylamine                            | HMDB0034198 | 74.0965  | C4H11N      | 0.05  | 1.46 | 0.02 | 0.54  |
| 98 | 5-Hydroxymethyl-2-furancarboxaldehyde             | HMDB0034355 | 125.0244 | C6H6O3      | 7.00  | 1.41 | 0.05 | 0.64  |
| 99 | Methyl 5-(1-Propynyl)-2-thiophenepropanoate       | HMDB0034759 | 226.0897 | C11H12O2S   | 0.95  | 1.31 | 0.02 | -1.00 |

|     |                                                              |             |          |             |       |      |      |       |
|-----|--------------------------------------------------------------|-------------|----------|-------------|-------|------|------|-------|
| 100 | Xanthopurpurin                                               | HMDB0036006 | 223.0393 | C14H8O4     | 19.08 | 1.54 | 0.03 | 0.79  |
| 101 | Ethyl 3,4,5-trimethoxybenzoate                               | HMDB0038627 | 239.0927 | C12H16O5    | 11.89 | 1.32 | 0.05 | 0.60  |
| 102 | S-Methyl hexanethioate                                       | HMDB0039465 | 205.0905 | C7H14OS     | 11.80 | 1.66 | 0.01 | 0.96  |
| 103 | Diethyl L-malate                                             | HMDB0040220 | 189.0770 | C8H14O5     | 8.43  | 1.31 | 0.04 | 0.41  |
| 104 | 4-Methylbenzyl alcohol                                       | HMDB0041609 | 121.0659 | C5H4O3      | 11.72 | 1.62 | 0.00 | 1.02  |
| 105 | Tyrosol 4-sulfate                                            | HMDB0041785 | 217.0177 | C8H10O5S    | 7.72  | 1.51 | 0.01 | 0.93  |
| 106 | 4-Chlorocatechol                                             | HMDB0041810 | 166.9864 | C6H5ClO2    | 0.53  | 1.51 | 0.01 | -1.57 |
| 107 | Pipemidic acid                                               | HMDB0041989 | 321.1657 | C14H17N5O3  | 7.48  | 1.45 | 0.01 | -2.54 |
| 108 | 3-Acetamidobutanol                                           | HMDB0059649 | 259.1652 | C6H11NO2    | 1.85  | 1.45 | 0.01 | 1.67  |
| 109 | 2-Deoxypentonic acid                                         | HMDB0059753 | 149.0455 | C5H10O5     | 4.64  | 1.30 | 0.04 | 0.60  |
| 110 | 1,N2-propanodeoxyguanosine                                   | HMDB0059780 | 288.1090 | C13H17N5O4  | 1.87  | 1.51 | 0.01 | 1.17  |
| 111 | Pyrogallol-2-O-sulphate                                      | HMDB0060018 | 204.9812 | C6H6O6S     | 1.31  | 1.48 | 0.02 | 0.85  |
| 112 | (S)-3-Sulfonatolactate                                       | HMDB0060176 | 168.9813 | C3H6O6S     | 1.11  | 1.51 | 0.04 | -1.42 |
| 113 | 2-aminophenol sulphate                                       | HMDB0061116 | 190.0169 | C6H7NO4S    | 0.74  | 1.76 | 0.00 | -0.93 |
| 114 | 3-Hydroxyhexadecanoic acid                                   | HMDB0061658 | 290.2694 | C16H32O3    | 14.76 | 1.45 | 0.02 | 0.72  |
| 115 | N-Methylene-ethenamine                                       | HMDB0061870 | 111.0919 | C3H5N       | 3.32  | 1.68 | 0.01 | -3.73 |
| 116 | Neuromedin B(1-3)                                            | HMDB0013016 | 285.1569 | C12H22N4O5  | 5.00  | 1.45 | 0.04 | 1.55  |
| 117 | N-lactoyl-Methionine                                         | HMDB0062182 | 222.0798 | C8H15NO4S   | 2.82  | 1.34 | 0.04 | 1.83  |
| 118 | 2-Deoxyglucose                                               | HMDB0062477 | 163.0614 | C6H12O5     | 1.41  | 1.09 | 0.03 | 0.31  |
| 119 | 4-Ethylphenylsulfate                                         | HMDB0062551 | 201.0228 | C8 H10 O4 S | 0.80  | 1.16 | 0.03 | -1.03 |
| 120 | N(2)-phenylacetyl-L-glutamate                                | HMDB0062645 | 265.1183 | C13H16N2O4  | 2.40  | 1.26 | 0.00 | 1.41  |
| 121 | MG(i-14:0/0:0/0:0)                                           | HMDB0072867 | 302.2698 | C17H34O4    | 16.72 | 1.58 | 0.02 | 0.53  |
| 122 | Pyroglutamylvaline                                           | HMDB0094651 | 229.1183 | C10H16N2O4  | 0.95  | 1.44 | 0.05 | -1.04 |
| 123 | N-Propionylalanine                                           | HMDB0094698 | 146.0813 | C6H11NO3    | 1.08  | 1.78 | 0.01 | 0.54  |
| 124 | 2-hydroxyhexanoylglycine                                     | HMDB009471  | 188.0929 | C8H15NO4    | 2.73  | 1.63 | 0.00 | -1.47 |
| 125 | 6-(3-carboxyphenoxy)-3,4,5-trihydroxyoxane-2-carboxylic acid | HMDB0124994 | 332.0978 | C13H14O9    | 7.40  | 1.33 | 0.03 | -4.57 |
| 126 | 4-Methoxy-3-(sulfooxy)benzoic acid                           | HMDB0140929 | 246.9919 | C8H8O7S     | 1.14  | 1.62 | 0.01 | 0.84  |
| 127 | Hydroquinone sulfate                                         | HMDB0240263 | 188.9865 | C6H6O5S     | 6.20  | 1.47 | 0.00 | 0.82  |
| 128 | N2,N5-Diacetylornithine                                      | HMDB0240345 | 217.1186 | C9H16N2O4   | 2.88  | 1.43 | 0.03 | -1.93 |
| 129 | Protocatechuic acid 4-O-sulfate                              | HMDB0240382 | 232.9763 | C7H6O7S     | 1.11  | 1.37 | 0.03 | 0.75  |
| 130 | 5-(Hydroxymethyl-2-furoyl)glycine                            | HMDB0240476 | 198.0409 | C8H9NO5     | 7.68  | 1.01 | 0.04 | 0.70  |
| 131 | Hydroxytyrosol 4'-sulfate                                    | HMDB0240532 | 233.0126 | C8H10O6S    | 7.32  | 1.35 | 0.02 | 0.89  |
| 132 | o-Cresol sulfate                                             | HMDB0240655 | 247.0282 | C7H8O4S     | 8.62  | 1.40 | 0.02 | 1.61  |
| 133 | 3-Methylcatechol 2-sulfate                                   | HMDB0240663 | 203.0021 | C7H8O5S     | 8.49  | 1.26 | 0.01 | 0.92  |
| 134 | 5-amino valeric acid betaine                                 | HMDB0240732 | 142.1231 | C8H17NO2    | 18.79 | 1.47 | 0.04 | 0.41  |
| 135 | (4E)-3-Hydroxydodec-4-enoylcarnitine                         | HMDB0241220 | 299.1854 | C19H35NO5   | 0.95  | 1.29 | 0.02 | 0.44  |
| 136 | 3-Hydroxydodeca-5,7-dienoylcarnitine                         | HMDB0241247 | 297.1695 | C19H33NO5   | 0.97  | 1.23 | 0.03 | 0.22  |
| 137 | 2,5-Bis(acetylamino)pentanoic acid                           | HMDB0242108 | 215.1038 | C9H16N2O4   | 4.49  | 1.74 | 0.00 | -1.66 |
| 138 | N(5)-Acetylornithine                                         | HMDB0242109 | 157.0973 | C7H14N2O3   | 4.54  | 1.55 | 0.02 | 0.45  |
| 139 | N-Oleoyl-L-Serine                                            | HMDB0242185 | 370.2958 | C21H39NO4   | 18.10 | 1.47 | 0.03 | 0.44  |
| 140 | 13-Docosenamide                                              | HMDB0244507 | 338.3422 | C22H43NO    | 18.56 | 1.47 | 0.03 | 0.49  |
| 141 | Citraconic anhydride                                         | HMDB0250302 | 111.0089 | C5H4O3      | 1.59  | 1.30 | 0.03 | -0.37 |
| 142 | L-isoleucinamide                                             | HMDB0253897 | 131.1180 | C6H14N2O    | 4.72  | 1.92 | 0.00 | 0.73  |
| 143 | Succinamic acid                                              | HMDB0258538 | 116.0353 | C4H7NO3     | 1.69  | 1.52 | 0.01 | 0.64  |
| 144 | ethyl-4-hydroxymethyl- 3(2H)-Furanone                        | HMDB0303864 | 283.1189 | C7H10O3     | 11.53 | 1.33 | 0.00 | 0.42  |
| 145 | indole-3-acetyl-glutamate                                    | HMDB0304379 | 361.1046 | C15H14N2O5  | 1.42  | 1.39 | 0.04 | -2.98 |
| 146 | indole-3-acetyl-glutamine                                    | HMDB0304380 | 325.1023 | C15H16N3O   | 2.33  | 1.52 | 0.01 | 2.14  |
| 147 | Adipamide                                                    | HMDB0304762 | 127.0866 | C6H12N2O2   | 1.08  | 1.70 | 0.02 | 0.36  |
| 148 | 4-Hydroxyphenylacetic acid sulfate                           | HMDB0304906 | 230.9969 | C8H8O6S     | 8.64  | 1.36 | 0.01 | 0.79  |

|     |                                                                    |             |          |           |       |      |      |       |
|-----|--------------------------------------------------------------------|-------------|----------|-----------|-------|------|------|-------|
| 149 | 2,3- Dimethoxyphenol sulfate                                       | HMDB0304926 | 233.0126 | C8H10O6S  | 0.95  | 1.33 | 0.05 | -0.62 |
| 150 | 3-methylundecanoic acid                                            | HMDB0340306 | 218.2115 | C12H24O2  | 11.10 | 1.31 | 0.05 | 0.95  |
| 151 | 9-methyltridecanoic acid                                           | HMDB0340321 | 246.2430 | C14H28O2  | 14.49 | 1.47 | 0.02 | 0.89  |
| 152 | 4-methylpentadecanoic acid                                         | HMDB0340340 | 274.2748 | C16H32O2  | 16.57 | 1.34 | 0.03 | 0.50  |
| 153 | 6-methylnonadecanoic acid                                          | HMDB0340381 | 312.3261 | C20H40O2  | 10.24 | 1.53 | 0.04 | 0.59  |
| 154 | 5-hydroxydec-3-enedioic acid                                       | HMDB0340543 | 215.0927 | C10H16O5  | 10.13 | 1.64 | 0.00 | 0.46  |
| 155 | dodeca-2,4-dienedioic acid                                         | HMDB0340706 | 285.1346 | C12H18O4  | 1.24  | 1.43 | 0.03 | 0.32  |
| 156 | (2E,4Z)-hexadeca-2,4-dienedioic acid                               | HMDB0340897 | 283.1911 | C16H26O4  | 0.72  | 1.52 | 0.04 | 0.60  |
| 157 | hept-4-enoic acid                                                  | HMDB0340960 | 127.0766 | C7H12O2   | 10.11 | 1.58 | 0.00 | 0.56  |
| 158 | 2-hydroxyhept-5-enoic acid                                         | HMDB0340964 | 143.0715 | C7H12O3   | 8.89  | 1.38 | 0.05 | 1.20  |
| 159 | 3-oxoheptanoic acid                                                | HMDB0340970 | 203.0926 | C7H12O3   | 9.78  | 1.08 | 0.03 | 0.75  |
| 160 | 5-hydroxyoct-2-enedioic acid                                       | HMDB0340987 | 187.0612 | C8H12O5   | 1.73  | 1.51 | 0.01 | -1.09 |
| 161 | non-6-enoic acid                                                   | HMDB0341014 | 155.1080 | C9H16O2   | 12.56 | 1.51 | 0.03 | 0.87  |
| 162 | (2E,6E)-nona-2,6-dienoic acid                                      | HMDB0341032 | 153.0923 | C9H14O2   | 11.93 | 1.17 | 0.03 | 0.56  |
| 163 | 6-Amino-1-MethylUracil                                             | HMDB0341121 | 281.0993 | C5H7N3O2  | 1.54  | 1.37 | 0.02 | 0.48  |
| 164 | Dihydroxy-2H-indole glucuronide                                    | HMDB0341439 | 324.0728 | C14H15NO8 | 1.42  | 1.40 | 0.02 | -2.01 |
| 165 | 5-(3',4',5'-Trihydroxyphenyl)-gamma-valerolactone-3'-O-glucuronide | HMDB59986   | 399.0938 | C17H20O11 | 8.87  | 1.57 | 0.03 | -0.85 |
| 166 | Carboxylic acids                                                   |             | 128.9596 |           | 5.44  | 1.39 | 0.05 | 0.39  |
| 167 | Medium-chain keto acids and derivatives                            |             | 157.8720 |           | 0.95  | 1.54 | 0.02 | 1.07  |
| 168 | Amino acids and derivatives                                        |             | 147.0255 |           | 4.25  | 1.50 | 0.04 | 0.42  |
| 169 | Dialkylamines                                                      |             | 171.0958 |           | 7.54  | 1.55 | 0.05 | -0.95 |
| 170 | Hydroxybenzoic acid derivatives                                    |             | 139.5314 |           | 4.14  | 1.47 | 0.04 | 0.78  |
| 171 | Imidazopyrimidines                                                 |             | 166.9962 |           | 6.20  | 1.47 | 0.01 | 0.86  |
| 172 | Lipids and lipid-like molecules                                    |             | 330.3012 |           | 17.06 | 1.50 | 0.03 | 0.54  |
| 173 | Lipids and lipid-like molecules                                    |             | 762.5588 |           | 19.00 | 1.49 | 0.02 | 0.47  |
| 174 | Medium-chain hydroxy acids and derivatives                         |             | 159.8695 |           | 0.95  | 1.53 | 0.02 | 1.05  |
| 175 | Organic acids and derivatives                                      |             | 296.9801 |           | 1.01  | 1.52 | 0.02 | 1.05  |
| 176 | Organic acids and derivatives                                      |             | 468.4423 |           | 17.72 | 1.56 | 0.03 | 0.45  |
| 177 | Organoheterocyclic compounds                                       |             | 255.0625 |           | 1.31  | 1.44 | 0.02 | 1.38  |
| 178 | Organosulfur compounds                                             |             | 178.8805 |           | 0.91  | 1.58 | 0.02 | 1.10  |
| 179 | Phenylpropanoic acids                                              |             | 164.8361 |           | 4.45  | 1.64 | 0.00 | 0.86  |
